# Supplementary material
Source: Springer Nature journal article supplement (https://www.springermedizin.de/resource/supplementary/12889_2012_4705_MOESM2_ESM.pdf/9493364)

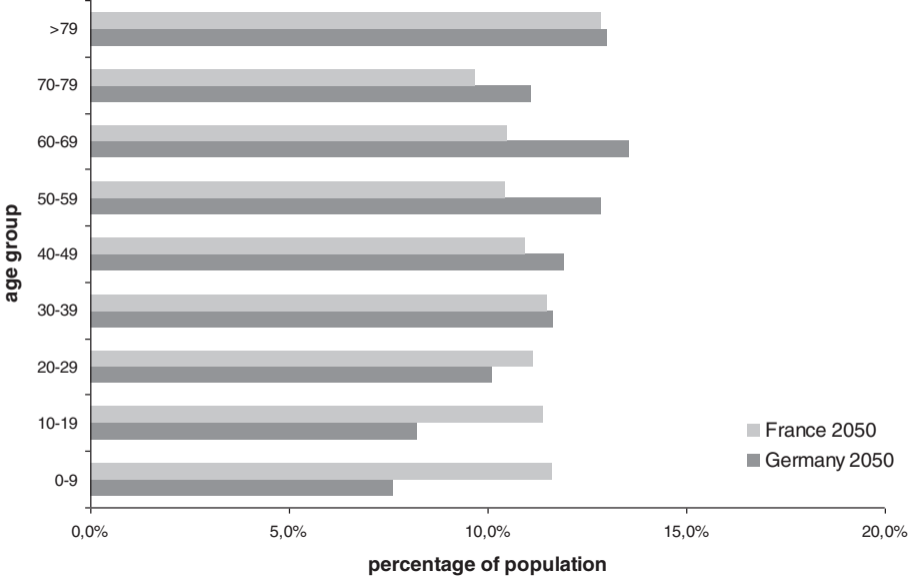

Supplement: MOESM2 [file 9493364]
